# Supplementary material for: HDAC11 promotes renal fibrosis by induing partial epithelial-mesenchymal transition and G2/M phase arrest in renal epithelial cells
Source: Research Square preprint supplement (doi:10.21203/rs.3.rs-6523050/v1), 2025-05-06
Supplement: Supplementary file 1 [file ec169a642bf6fdc6e940684e.docx]

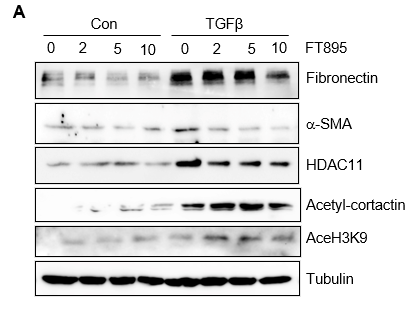


**Supplemental Figure 1. FT895 inhibits TGF-b1(TGFb)-induced expression of fibronectin and a-SMA in a dose dependent manner.** Serum-starved RTPCs were treated with 10 mM FT895 for 1 h followed by exposure of cells to TGF-β1 (5 ng/ml) for an additional 24 h. Cell lysates were then prepared and subjected to immunoblot analysis with antibodies against proteins as indicated.
